# Supplementary material
Source: publisher figshare collection journal article supplement (https://tandf.figshare.com/ndownloader/files/14701442)
Supplement: Supplementary file 1 [file 14701442]

**Supplementary Figure 1: MEDLINE Search Strategy**

**Concept 1: Collaborative care**

(“stepped care”[tw] OR electronic consultat*[tiab] Or “e consult”[tiab] OR “integrated healthcare”[tiab] OR “integrated care”[tiab] OR “collaborative care”[tiab] OR “collaborative healthcare”[tiab] OR collaboration[tiab] OR MCPAP[tw] OR “child psychiatry access program”[tw] OR “child psychiatry access programs”[tw] OR telepsychiatr*[tiab] OR teleconsult*[tiab] OR “telehealth”[tiab] OR embedded psychiatr*[tiab] OR “co located care”[tw] OR “collocated care”[tw] OR “co location”[tiab] OR colocation[tiab] OR “integrated behavioral health”[tiab] OR “shared care”[tw] OR “interprofessional”[tiab] OR interdisciplinary[tiab] OR multidisciplinary[tiab] OR “patient care teams”[tiab] OR “patient care team”[tiab] OR “healthcare teams”[tiab] OR “healthcare team”[tiab] OR "Interprofessional Relations"[Mesh] OR "Interdisciplinary Communication"[Mesh] OR "Telemedicine"[Mesh] OR "Behavioral Medicine"[Mesh] OR “Patient Care Team"[Mesh])

AND

**Concept 2: Children/Adolescents**

(child*[tiab] or youth*[tiab] or young[tiab] OR adolescen*[tiab] OR teen*[tiab] OR "Child"[Mesh] OR "Adolescent"[Mesh])

AND

**Concept 3: Primary Care**

(“primary care”[tiab] OR “family practice”[tiab] OR paediatric*[tiab] OR pediatric*[tiab] OR nurse practitioner*[tiab] OR PCP*[tiab] OR PCC*[tiab] OR "Primary Health Care"[Mesh] OR "Family Practice"[Mesh] OR "Pediatrics"[Mesh] OR "Nurse Practitioners"[Mesh] OR "Child Health Services"[Mesh] OR "Child Health"[Mesh] OR "Physicians"[Mesh])

AND

**Concept 4: Mental health**

(“behavioral health”[tiab] OR “mental health”[tiab] OR psychiatr*[tiab] OR psycholog*[tiab] OR counsel*[tiab] OR "Psychiatry"[Mesh] OR "Psychology"[Mesh] OR "Mental Health"[Mesh] OR "Counseling"[Mesh] OR "Mental Health Services"[Mesh])

AND

**Concept 5: Implementation outcomes**

(implement*[tw] OR acceptab*[tw] OR agreeable[tw] OR satisfaction[tw] OR credibility[tw] OR adopt*[tw] OR uptake[tw] OR utility[tw] OR utilization[tw] OR utilisation[tw] OR discontinuation[tw] OR de-adoption[tw] OR appropriate*[tw] OR fit[tw] OR relevance[tw] OR compatib*[tw] OR usefulness[tw] OR feasib*[tw] OR suitab*[tw] OR practicability[tw] OR applicab*[tw] OR workab*[tw] OR transferab*[tw] OR penetrat*[tw] OR reach[tw] OR spread[tw] OR coverage[tw] OR sustain*[tw] OR maintenance[tw] OR continuation[tw] OR durab*[tw] OR incorporat*[tw] OR integrat*[tw] OR institutionalisation[tw] OR institutionalization[tw] OR routinization[tw] OR routinisation[tw] OR normalisation[tw] OR normalization[tw] OR "Patient Acceptance of Health Care"[Mesh] OR "Feasibility Studies"[Mesh] OR "Program Evaluation"[Mesh] OR "Diffusion of Innovation"[Mesh])
